# Supplementary material
Source: PubMed Central journal article supplement (PMC4097584)
Supplement: JB.01623-14_zjb999093215so1.pdf [file JB.01623-14_zjb999093215so1.pdf]

**Table S1** List of oligonucleotides used in this study

| Names   | Sequences (5'→3') <sup>a</sup>                                              | Use                                       |
|---------|-----------------------------------------------------------------------------|-------------------------------------------|
| OCB706  | <u>GAATTC</u> CATATGCGTGAAAAGACAGAGGC                                       | pMLBAD-rsiC construction                  |
| OCB707  | <u>CCCGGG</u> TCGACTCAAAGCGGCAGCCGGATCA                                     | pMLBAD-rsiC construction                  |
| OCB984  | <u>GAATTC</u> CATATGTATGACGGCATGTTTCGCAT                                    | pMLBAD-rsiB1-strep construction           |
| OCB985  | <u>TCTAGAATTTTTCGAACTGCGGGTGGCTCCA</u> <u>CCCGGG</u><br>AAGCGGCAGCCGGATCAAC | pMLBAD-rsiB1-strep construction           |
| OCB668  | <u>GAATTC</u> CATATGACATTGTCCACCCGTATTG                                     | pMLBAD-rsiB1-strep construction           |
| OCB986  | TCTAGAA <u>CCCGGG</u> GCGGCTGCCTTTGTCG                                      | pMLBAD-rsiB1-strep construction           |
| OCB1035 | <u>GGATCCC</u> GATTGTTCTGGACGGTC                                            | pMLBAD-rsiC-H318K construction            |
| OCB1031 | <u>ACGCGT</u> TTGTTGAGCTCCTTCAGCAACAG                                       | pMLBAD-rsiC-H318K construction            |
| OCB1032 | <u>ACGCGT</u> CAAGAACACGCTTGCAATG                                           | pMLBAD-rsiC-H318K construction            |
| OCB684  | <u>GAATTC</u> CATATGCCACTTTCACAAGG                                          | pMLBAD-rsiB2-D191A construction           |
| OCB938  | <u>CAGCTG</u> GATAGCCGCAAG                                                  | pMLBAD-rsiB2-D191A construction           |
| OCB680  | <u>GGATCCT</u> GATTGATCCTGCAGCGC                                            | <i>rsiC</i> upstream                      |
| OCB681  | <u>GTCGAC</u> CAGCCTGAAGGACACCGAG                                           | <i>rsiC</i> upstream                      |
| OCB716  | ACCTATCGATCGTTCGCTGCG                                                       | <i>rsiC</i> downstream                    |
| OCB717  | <u>CGGAGCTC</u> GACCGAGTATGAAGGGGAGC                                        | <i>rsiC</i> downstream                    |
| OCB946  | <u>GAGCTC</u> GCTCCGCTGCCACGCCAG                                            | SMc00322 upstream                         |
| OCB947  | <u>GGATCC</u> ATTTTACCGCTCTACCGATC                                          | SMc00322 upstream                         |
| OCB958  | <u>GTCGAC</u> CAGATAGTCGAGGAGCGAC                                           | SMc00322 downstream                       |
| OCB959  | <u>GGATCCC</u> AAGGATCATTCTCGCAG                                            | SMc00322 downstream                       |
| OCB798  | <u>GAGCTC</u> GCGTAGTAGTCTTGATCCACG                                         | SMa1001 upstream                          |
| OCB799  | <u>GGATCCC</u> TTCTTGCTTCCCTCTCGG                                           | SMa1001 upstream                          |
| OCB800  | <u>GGATCC</u> GCGCTCTCAAGTCGGTCGG                                           | SMa1001 downstream                        |
| OCB801  | <u>CTCGAG</u> GTCATCGCTGTAACCAGC                                            | SMa1001 downstream                        |
| OCB802  | <u>GTCGAC</u> CCAGCAATCGGTGAACAGTG                                          | SMa2063 upstream                          |
| OCB803  | <u>GGATCC</u> GAGCGATCACACCTCCGGG                                           | SMa2063 upstream                          |
| OCB804  | <u>GGATCC</u> GAGATTAGGGTATGGCTCC                                           | SMa2063 downstream                        |
| OCB805  | <u>GAGCTC</u> CTTGCTGGTGGAGCTGGTG                                           | SMa2063 downstream                        |
| OCB516  | CGGAAACGCTTGACATCAC                                                         | screening of $\Delta$ <i>rsiC</i> mutants |
| OCB714  | TCATCGCAGCCGCTTTGCTG                                                        | screening of $\Delta$ <i>rsiC</i> mutants |
| OCB962  | CAACCCGATCATCCTGCG                                                          | screening of $\Delta$ SMc00322 mutants    |
| OCB963  | GCACCGATCAGCTTGGTG                                                          | screening of $\Delta$ SMc00322 mutants    |
| OCB857  | CGCTTTTCAGATCGGCTTG                                                         | screening of $\Delta$ SMa1001 mutants     |
| OCB858  | CCTTCGGCTGCTCCGCTC                                                          | screening of $\Delta$ SMa1001 mutants     |
| OCB859  | GAATGGCTCTGCGTCAGTTC                                                        | screening of $\Delta$ SMa2063 mutants     |
| OCB860  | GTGCAGTGGCTGAAGCAG                                                          | screening of $\Delta$ SMa2063 mutants     |

<sup>a</sup>Restriction sites are underlined. The strep-tag coding sequence is indicated in bold letters.

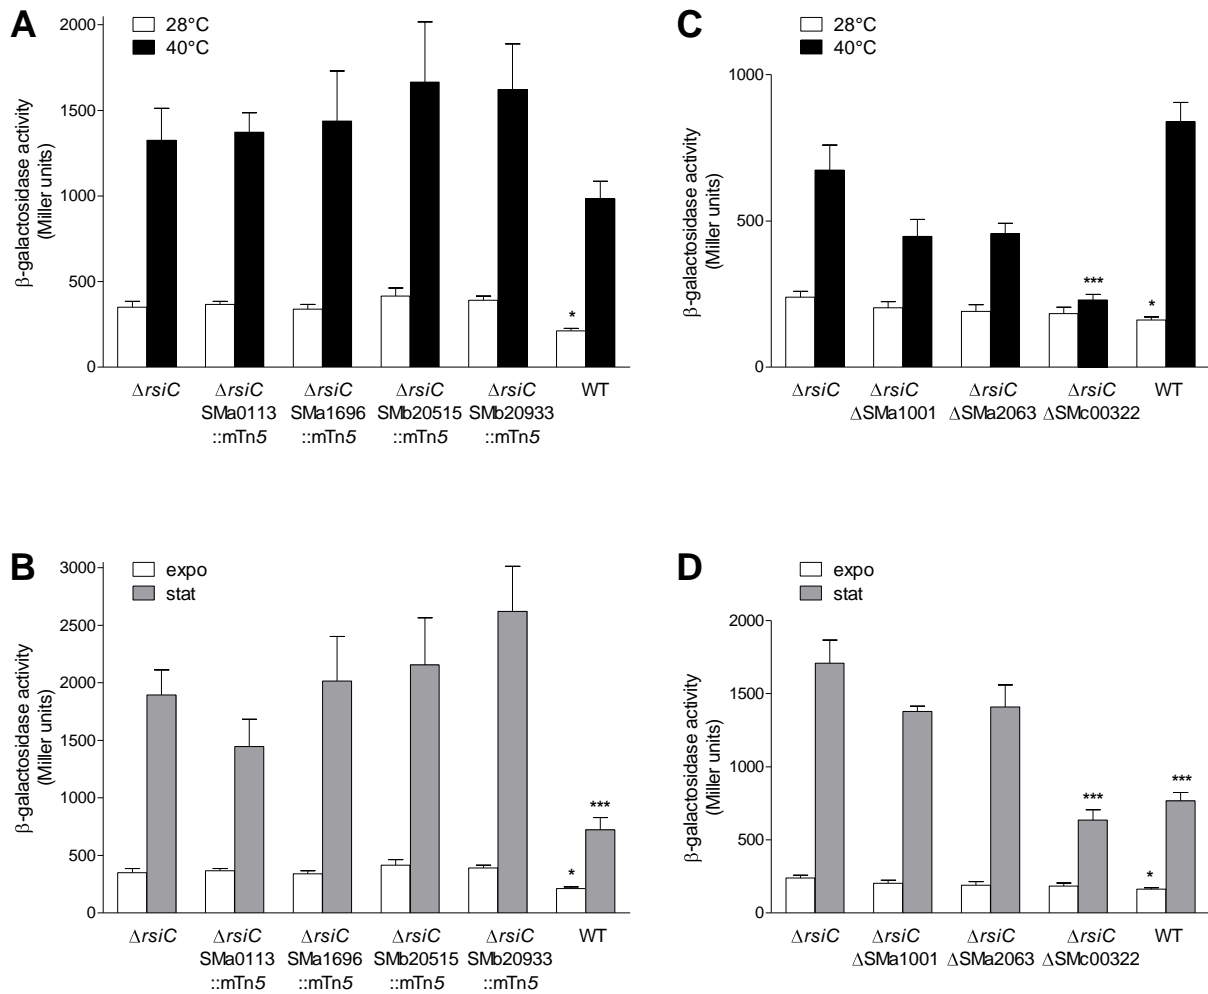

**FIG S1** SMc00322 is the main  $H_W$ -type kinase contributing to RpoE2 activation in the absence of RsiC. The transcription level of the  $P_{SMc00885}$ -*lacZ* fusion carried on plasmid pMP220-885, used as a reporter of RpoE2 activity, was measured in the following *S. meliloti* strains: (A, B) Rm2011 background: CBT1710 ( $\Delta rsiC$ ), CBT1702 ( $\Delta rsiC$  SMa0113::mTn5), CBT1706 ( $\Delta rsiC$  SMa1696::mTn5), CBT1704 ( $\Delta rsiC$  SMb20515::mTn5), CBT1708 ( $\Delta rsiC$  SMb20933::mTn5) and GMI11495 (WT); (C, D) Rm1021 background: CBT785 ( $\Delta rsiC$ ), CBT862 ( $\Delta rsiC$   $\Delta$ SMa1001), CBT866 ( $\Delta rsiC$   $\Delta$ SMa2063), CBT1169 ( $\Delta rsiC$   $\Delta$ SMc00322), Rm1021 (WT).  $\beta$ -galactosidase activity was measured on aliquots of cultures grown to exponential phase at 28°C (white bars), after 1h at 40°C (black bars), or grown for 48 h in stationary phase (gray bars).  $\beta$ -galactosidase activities are means and standard errors from at least three independent experiments. Statistical analyses were performed on Log-transformed data using a one way ANOVA ( $P < 0.0001$ ). The Bonferroni post-test was used to compare each strain to its isogenic  $\Delta rsiC$  mutant grown under identical culture conditions (\*,  $P < 0.05$ ; \*\*\*,  $P < 0.001$ ).
